# Supplementary material
Source: Springer Nature journal article supplement (https://www.springermedizin.de/resource/supplementary/12876_2008_313_MOESM3_ESM.pdf/9439144)

NH<sub>4</sub> mcMol/L

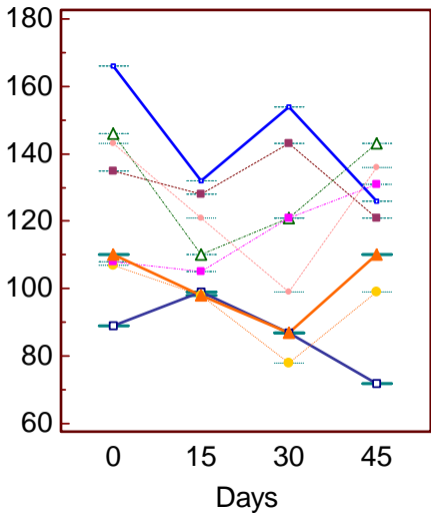

Patients

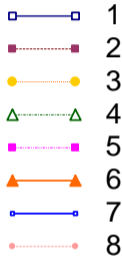

Supplement: MOESM3 [file 9439144]
